# Supplementary material
Source: publisher site journal article supplement (https://www.dovepress.com/article/307603)
Supplement: Supplementary file 1 [file get_supplementary_file.php]

**Supplementary Table 1.** *ICD-10-CM* Codes for Select Conditions and Comorbidities

| **Condition** | ***ICD-10-CM* Code(s)** |
| --- | --- |
| Nonexudative AMD, right eye, early or intermediate dry stage | H353111, H353112 |
| Nonexudative AMD, right eye, advanced atrophic without subfoveal involvement | H353113 |
| Nonexudative AMD, right eye, advanced atrophic with subfoveal involvement | H353114 |
| Nonexudative AMD, left eye, early or intermediate dry stage | H353121, H353122 |
| Nonexudative AMD, left eye, advanced atrophic without subfoveal involvement | H353123 |
| Nonexudative AMD, left eye, advanced atrophic with subfoveal involvement | H353124 |
| Nonexudative AMD, bilateral eyes, early dry or intermediate stage | H353131 |
| Nonexudative AMD, bilateral eyes, advanced atrophic without subfoveal involvement | H353133 |
| Nonexudative AMD, bilateral eyes, advanced atrophic with subfoveal involvement | H353134 |
| **Baseline Comorbidities** |  |
| Exudative AMD | H3532, H3572-H3573 |
| Diabetic Retinopathy | E08-E11, E13 |
| Glaucoma | H40 |
| Major Depressive Disorder | F32-33, F341 |
| Anxiety Disorders | F064, F40-F41, F4322 |
| **Exclusion codes** |  |
| Nonexudative AMD, right eye | H35311 |
| Nonexudative AMD, left eye | H35312 |
| Nonexudative AMD, bilateral eyes | H35313 |
| Nonexudative AMD, unspecified eye | H35319 |
| Nonexudative AMD, unspecified eye, early or intermediate dry stage | H353191 |
| Nonexudative AMD, bilateral eyes, advanced atrophic without subfoveal involvement | H353133 |
| Nonexudative AMD, bilateral eyes, advanced atrophic with subfoveal involvement | H353134 |

Abbreviations: AMD, age-related macular degeneration; *ICD-10-CM, International Classification of Diseases, Tenth Revision, Clinical Modification*.

**Supplementary Table 2.** Total All-Cause Healthcare Resource Utilization

|  | **Unilateral** | | |  | **Adjusteda IRR** | |
| --- | --- | --- | --- | --- | --- | --- |
| **EI AMD** | **GAwoSF** | **GAwSF** |  | **GAwoSF** | **GAwSF** |
| **(n=6226)** | **(n=351)** | **(n=330)** |  | **Estimate (95% CI)** | **Estimate (95% CI)** |
| **Outpatient visits, n** | 125,304 | 7791 | 6948 |  |  |  |
| No. of pts, n (%) | 5308 (85.3) | 300 (85.5) | 275 (83.3) |  | 1.089b  (1.005–1.179) | 0.934  (0.858–1.016) |
| No. of visits, mean (SD) | 23.6 (20.0) | 26.0 (21.8) | 25.3 (18.4) |  |  |
|  |  |  |  |  |  |  |
| **ED visits, n** | 2583 | 209 | 224 |  |  |  |
| No. of pts, n (%) | 703 (11.3) | 55 (15.7) | 57 (17.3) |  | 1.048  (0.852–1.290) | 0.947  (0.772–1.162) |
| No. of visits, mean (SD) | 3.7 (3.8) | 3.8 (2.7) | 3.9 (3.9) |  |  |  |
|  |  |  |  |  |  |  |
| **Inpatient admissions, n** | 7474 | 429 | 621 |  |  |  |
| No. of pts, n (%) | 538 (8.6) | 41 (11.7) | 41 (12.4) |  | 0.863  (0.640–1.162) | 1.183  (0.885–1.581) |
| No. of visits, mean (SD) | 13.9 (23.6) | 10.5 (10.4) | 15.1 (19.3) |  |  |  |
| Length of stay, mean (SD) | 6.0 (13.7) | 5.9 (10.4) | 7.4 (11.5) |  |  |  |
|  | **Bilateral** | | |  | **Adjusteda IRR** | |
| **EI AMD** | **GAwoSF** | **GAwSF** |  | **GAwoSF** | **GAwSF** |
| **(n=20,585)** | **(n=647)** | **(n=634)** |  | **Estimate (95% CI)** | **Estimate (95% CI)** |
| **Outpatient visits, n** | 383,010 | 12,164 | 12,405 |  |  |  |
| No. of pts, n (%) | 16,959 (82.4) | 490 (75.7) | 522 (82.3) |  | 1.032  (0.967–1.101) | 1.020  (0.958–1.087) |
| No. of visits, mean (SD) | 22.6 (19.9) | 24.8 (21.3) | 23.8 (19.3) |  |
|  |  |  |  |  |  |  |
| **ED visits, n** | 9410 | 394 | 537 |  |  |  |
| No. of pts, n (%) | 2526 (12.3) | 94 (14.5) | 131 (20.7) |  | 1.119  (0.965–1.297) | 0.927  (0.816–1.054) |
| No. of visits, mean (SD) | 3.7 (3.7) | 4.2 (4.1) | 4.1 (3.0) |  |  |  |
|  |  |  |  |  |  |  |
| **Inpatient admissions, n** | 22,296 | 908 | 1,005 |  |  |  |
| No. of pts, n (%) | 1882 (9.1) | 81 (12.5) | 83 (13.1) |  | 0.987  (0.819–1.190) | 1.083  (0.900–1.304) |
| No. of visits, mean (SD) | 11.8 (19.4) | 11.2 (11.1) | 12.1 (21.5) |  |
| Length of stay, mean (SD) | 5.2 (13.1) | 4.9 (8.7) | 7.8 (16.3) |  |

aAdjusted for age, gender, region, insurance type, Charlson Comorbidity Index, and baseline comorbidities.

bp<0.05, using “early/intermediate AMD” as the referent category.

Abbreviations: CI, confidence interval; ED, emergency department; EI AMD, early or intermediate AMD; GAwoSF, geographic atrophy without subfoveal involvement; GAwSF, geographic atrophy with subfoveal involvement; IRR, incident rate ratio; NA, not applicable; SD, standard deviation.

**Supplementary Table 3.** Total All-Cause Direct Healthcare Costs

|  | **Unilateral** | | |  | **Adjusteda Incremental Difference** | |
| --- | --- | --- | --- | --- | --- | --- |
| **EI AMD** | **GAwoSF** | **GAwSF** |  | **GAwoSF** | **GAwSF** |
| **(n=6226)** | **(n=351)** | **(n=330)** |  |  |  |
|  | **Mean (SD), $** | **Mean (SD), $** | **Mean (SD), $** |  | **Estimate (95% CI)** | **Estimate (95% CI)** |
| **OP visits** |  |  |  |  |  |  |
| Patient-relatedb | 666 (970) | 594 (848) | 580 (1368) |  | -70 (-171 to 32) | 9 (-112 to 130) |
| Payer-related | 3462 (5144) | 3357 (3685) | 4480 (14,884) |  | -80 (-653 to 493) | 313 (-358 to 985) |
|  |  |  |  |  |  |  |
| **ED visits** |  |  |  |  |  |  |
| Patient-relatedb | 102 (366) | 27 (62) | 126 (694) |  | -69 (-126 to -12)b | 690 (-225 to 1605) |
| Payer-related | 426 (646) | 425 (475) | 393 (545) |  | -15 (-180 to 150) | 21 (-156 to 198) |
|  |  |  |  |  |  |  |
| **IP admissions** |  |  |  |  |  |  |
| Patient-relatedb | 500 (1033) | 261 (463) | 960 (2278) |  | -166 (-405 to 72) | 1004 (-146 to 2155) |
| Payer-related | 12,411 (22,069) | 6190 (9523) | 14,147 (17,708) |  | -6009 (-9682 to -2335)b | 1506 (-5887 to 8898) |
|  | **Bilateral** | | |  | **Adjusteda Incremental Difference** | |
| **EI AMD** | **GAwoSF** | **GAwSF** |  | **GAwoSF** | **GAwSF** |
| **(n=20,585)** | **(n=647)** | **(n=634)** |  |  |  |
|  | **Mean (SD), $** | **Mean (SD), $** | **Mean (SD), $** |  | **Estimate (95% CI)** | **Estimate (95% CI)** |
| **OP visits** |  |  |  |  |  |  |
| Patient-relatedb | 604 (961) | 580 (888) | 467 (741) |  | 16 (-66 to 99) | 16 (-65 to 97) |
| Payer-related | 2811 (4680) | 3043 (5206) | 2981 (6948) |  | 237 (-189 to 662) | 356 (-74 to 786) |
|  |  |  |  |  |  |  |
| **ED visits** | 1 | 0 | 0 |  |  |  |
| Patient-relatedb | 89 (347) | 55 (198) | 44 (134) |  | 9 (-60 to 78) | 20 (-48 to 88) |
| Payer-related | 424 (739) | 393 (441) | 432 (485) |  | 23 (-104 to 150) | 9 (-98 to 115) |
|  |  |  |  |  |  |  |
| **IP Admissions** |  |  |  |  |  |  |
| Patient-relatedb | 519 (1056) | 701 (2157) | 604 (1042) |  | 405 (-81 to 891) | 49 (-247 to 345) |
| Payer-related | 11,611 (20,154) | 9541 (14,758) | 12,930 (20,635) |  | -379 (-4567 to 3810) | 238 (-4122 to 4598) |

Note: Costs are shown in 2019 U.S. dollars.

aAdjusted for age, gender, region, insurance type, Charlson Comorbidity Index, and baseline comorbidities.

bPatient-related costs include patient copay, coinsurance, deductible.

cp<0.05, using “early/intermediate AMD” as the referent category.

Abbreviations: CI, confidence interval; ED, emergency department; EI AMD, early or intermediate AMD; GAwoSF, geographic atrophy without subfoveal involvement; GAwSF, geographic atrophy with subfoveal involvement; NA, not applicable; SD, standard deviation.
